# Supplementary material for: Effects of Lipoic Acid on High-Fat Diet-Induced Alteration of Synaptic Plasticity and Brain Glucose Metabolism: A PET/CT and 13C-NMR Study
Source: PubMed Central journal article supplement (PMC5511189; doi:10.1038/s41598-017-05217-z), 2017-07-14
Supplement: 41598_2017_5217_MOESM1_ESM.pdf [file 41598_2017_5217_MOESM1_ESM.pdf]

**EFFECTS OF LIPOIC ACID ON HIGH-FAT DIET-INDUCED ALTERATION OF  
SYNAPTIC PLASTICITY AND BRAIN GLUCOSE METABOLISM:  
A PET/CT AND <sup>13</sup>C-NMR STUDY**

Zhigang Liu, Ishan Patil, Harsh Sancheti, Fei Yin, and Enrique Cadenas

*Supplementary Information File 1*

**Supplemental Figure 1**

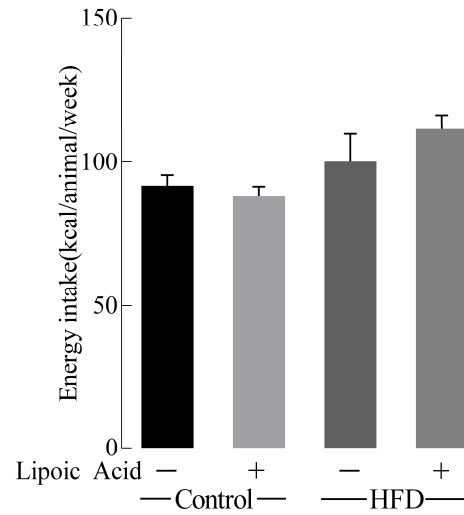

**Supplemental Figure 1.** Mice were fed with 9-week HFD or normal diet, with or without lipoic acid administration in drinking water (0.23% w/v) and the energy intake were monitored weekly and calculated at the end of the test.

## Supplemental Figure 2

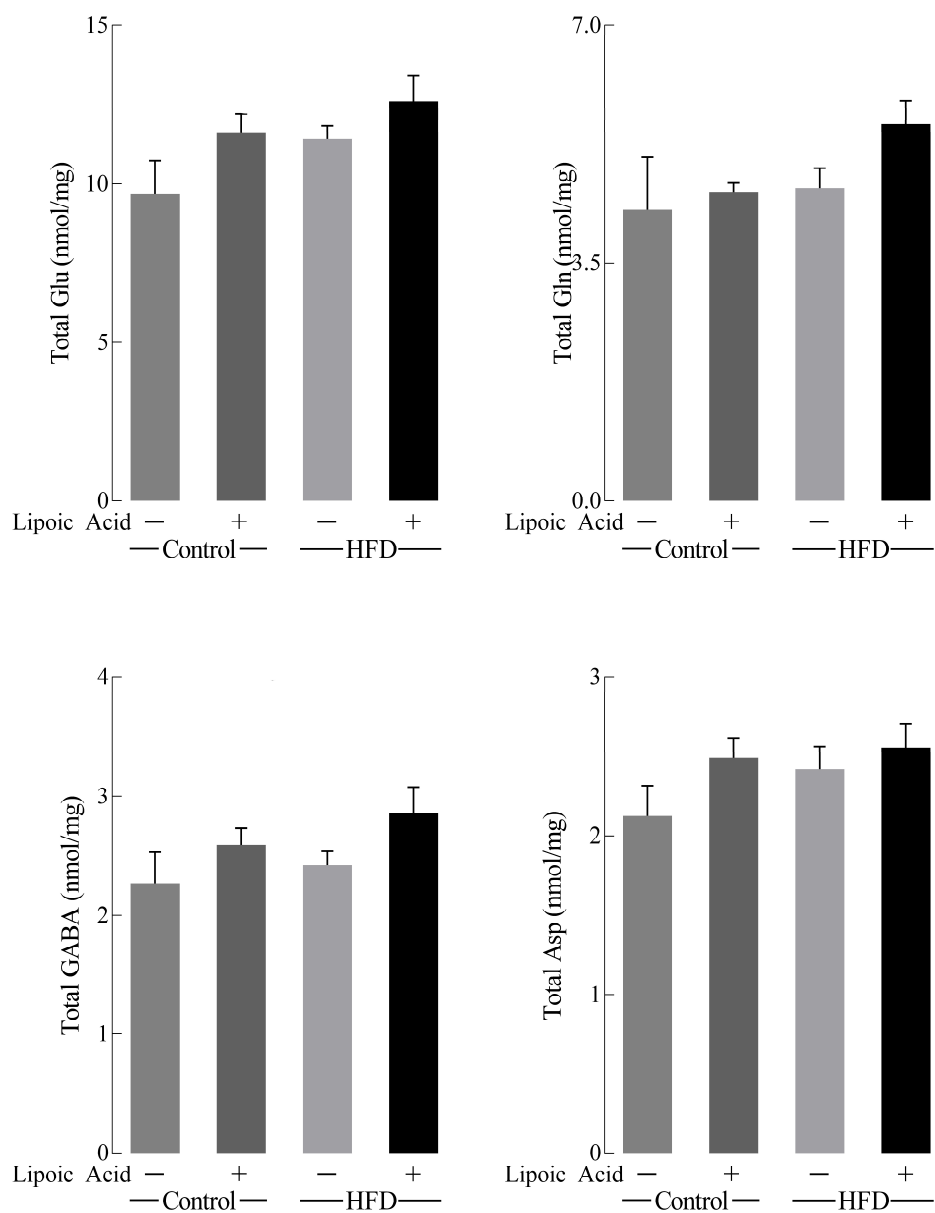

**Supplemental Figure 2.** Total metabolite levels ( $^{12}\text{C}+^{13}\text{C}$ ) of Glu, Gln, GABA, and Asp in C57BL/6 mice  $\pm$  lipotic acid feeding shown as mean nmol/mg brain tissue  $\pm$  SEM.

### Supplemental Figure 3

Original, full-length, and cropped images of western blots presented in Figure 3.

**3A.**

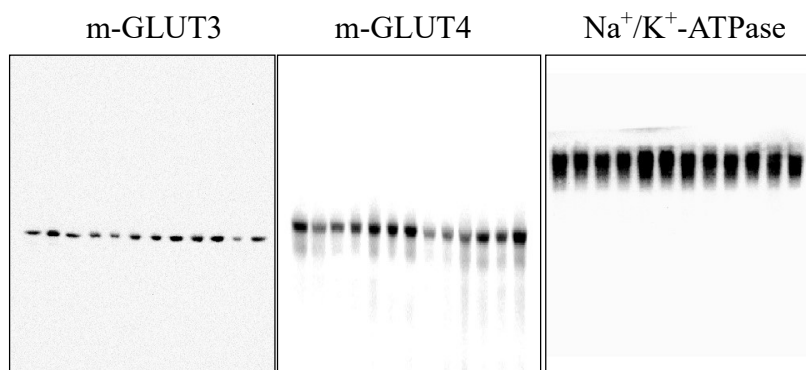

**3B.**

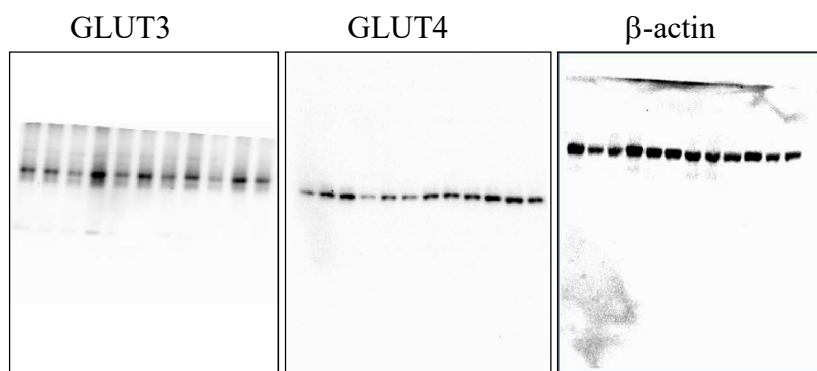

**3C.**

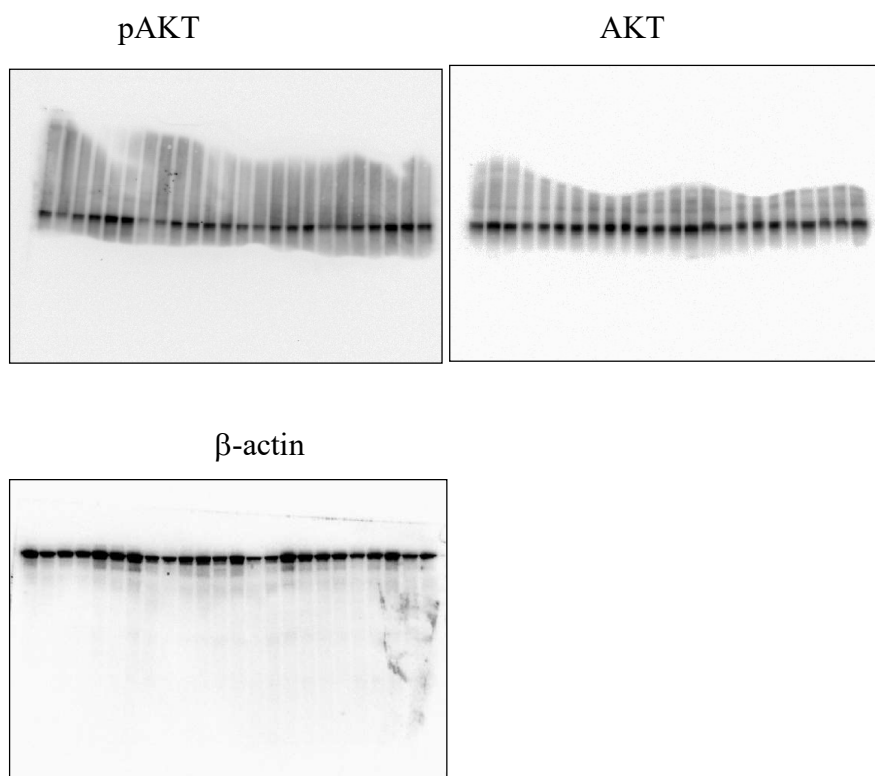

**Supplemental Table 1**

| <b>Table 1</b>              | <b>TWO WAY ANOVA</b> |                     |            | <b>Newman-Keuls multiple comparisons test</b> |    |
|-----------------------------|----------------------|---------------------|------------|-----------------------------------------------|----|
| [3- <sup>13</sup> C]-Ala    |                      | F (DFn, DFd)        | P value    | <b>HFD vs. CON</b>                            | *  |
|                             | Interaction          | F (1, 15) = 4.972   | P = 0.0415 | LA vs. CON                                    | ns |
|                             | HFD                  | F (1, 15) = 3.065   | P = 0.1004 | LA:HFD vs. CON                                | ns |
|                             | LA                   | F (1, 15) = 4.143   | P = 0.0599 | <b>LA vs. HFD</b>                             | *  |
|                             |                      |                     |            | <b>LA:HFD vs. HFD</b>                         | *  |
|                             |                      |                     |            | LA:HFD vs. LA                                 | ns |
| [3- <sup>13</sup> C]-Lac    | Interaction          | F (1, 15) = 0.1344  | P = 0.7182 | HFD vs CON                                    | ns |
|                             | HFD                  | F (1, 15) = 2.065   | P = 0.1679 | LA vs CON                                     | ns |
|                             | LA                   | F (1, 15) = 0.01922 | P = 0.8913 | LA:HFD vs. CON                                | ns |
|                             |                      |                     |            | LA vs HFD                                     | ns |
|                             |                      |                     |            | LA:HFD vs HFD                                 | ns |
|                             |                      |                     |            | LA:HFD vs. LA                                 | ns |
| [4- <sup>13</sup> C]-Glu    | ANOVA table          | F (DFn, DFd)        | P value    | HFD vs CON                                    | ns |
|                             | Interaction          | F (1, 15) = 0.1373  | P = 0.7165 | LA vs CON                                     | ns |
|                             | HFD                  | F (1, 15) = 3.478   | P = 0.0833 | LA:HFD vs. CON                                | ns |
|                             | LA                   | F (1, 15) = 1.376   | P = 0.2604 | LA vs HFD                                     | ns |
|                             |                      |                     |            | LA:HFD vs HFD                                 | ns |
|                             |                      |                     |            | LA:HFD vs. LA                                 | ns |
| [3- <sup>13</sup> C]-Glu    | Interaction          | F (1, 15) = 0.03425 | P = 0.8556 | HFD vs CON                                    | ns |
|                             | HFD                  | F (1, 15) = 2.804   | P = 0.1147 | LA vs CON                                     | ns |
|                             | LA                   | F (1, 15) = 1.143   | P = 0.3019 | LA:HFD vs. CON                                | ns |
|                             |                      |                     |            | LA vs HFD                                     | ns |
|                             |                      |                     |            | LA:HFD vs HFD                                 | ns |
|                             |                      |                     |            | LA:HFD vs. LA                                 | ns |
| [2- <sup>13</sup> C]-Glu    | Interaction          | F (1, 15) = 0.1613  | P = 0.6930 | HFD vs CON                                    | ns |
|                             | HFD                  | F (1, 15) = 3.254   | P = 0.0890 | LA vs CON                                     | ns |
|                             | LA                   | F (1, 15) = 0.9936  | P = 0.3328 | LA:HFD vs. CON                                | ns |
|                             |                      |                     |            | LA vs HFD                                     | ns |
|                             |                      |                     |            | LA:HFD vs HFD                                 | ns |
|                             |                      |                     |            | LA:HFD vs. LA                                 | ns |
| [4, 5- <sup>13</sup> C]-Glu | Interaction          | F (1, 15) = 0.1938  | P = 0.6657 | HFD vs CON                                    | ns |
|                             | HFD                  | F (1, 15) = 5.679   | P = 0.0299 | LA vs CON                                     | ns |

|                             |             |                       |            |                   |    |
|-----------------------------|-------------|-----------------------|------------|-------------------|----|
|                             | LA          | F (1, 15) = 3.487     | P = 0.0803 | LA:HFD vs. CON    | ns |
|                             |             |                       |            | LA vs HFD         | ns |
|                             |             |                       |            | LA:HFD vs HFD     | ns |
|                             |             |                       |            | LA:HFD vs. LA     | ns |
| [1, 2- <sup>13</sup> C]-Glu | Interaction | F (1, 15) = 0.9158    | P = 0.3528 | HFD vs CON        | ns |
|                             | HFD         | F (1, 15) = 2.048     | P = 0.1716 | LA vs CON         | ns |
|                             | LA          | F (1, 15) = 5.878     | P = 0.0275 | LA:HFD vs. CON    | ns |
|                             |             |                       |            | LA vs HFD         | ns |
|                             |             |                       |            | LA:HFD vs HFD     | ns |
|                             |             |                       |            | LA:HFD vs. LA     | ns |
| [2, 3- <sup>13</sup> C]-Glu | Interaction | F (1, 15) = 0.01697   | P = 0.8984 | HFD vs CON        | ns |
|                             | HFD         | F (1, 15) = 0.2738    | P = 0.6096 | LA vs CON         | ns |
|                             | LA          | F (1, 15) = 0.006307  | P = 0.9379 | LA:HFD vs. CON    | ns |
|                             |             |                       |            | LA vs HFD         | ns |
|                             |             |                       |            | LA:HFD vs HFD     | ns |
|                             |             |                       |            | LA:HFD vs. LA     | ns |
| [4- <sup>13</sup> C]-Gln    | Interaction | F (1, 15) = 0.0005792 | P = 0.9811 | HFD vs CON        | ns |
|                             | HFD         | F (1, 15) = 0.9444    | P = 0.3466 | LA vs CON         | ns |
|                             | LA          | F (1, 15) = 3.696     | P = 0.0738 | LA:HFD vs. CON    | ns |
|                             |             |                       |            | LA vs HFD         | ns |
|                             |             |                       |            | LA:HFD vs HFD     | ns |
|                             |             |                       |            | LA:HFD vs. LA     | ns |
| [3- <sup>13</sup> C]-Gln    | Interaction | F (1, 15) = 0.3652    | P = 0.5553 | HFD vs CON        | ns |
|                             | HFD         | F (1, 15) = 2.471     | P = 0.1383 | LA vs CON         | ns |
|                             | LA          | F (1, 15) = 4.095     | P = 0.0625 | LA:HFD vs. CON    | ns |
|                             |             |                       |            | LA vs HFD         | ns |
|                             |             |                       |            | LA:HFD vs HFD     | ns |
|                             |             |                       |            | LA:HFD vs. LA     | ns |
| [2- <sup>13</sup> C]-Gln    | Interaction | F (1, 15) = 0.4121    | P = 0.5306 | HFD vs CON        | ns |
|                             | HFD         | F (1, 15) = 0.7968    | P = 0.3861 | LA vs CON         | ns |
|                             | LA          | F (1, 15) = 0.6556    | P = 0.4308 | LA:HFD vs. CON    | ns |
|                             |             |                       |            | LA vs HFD         | ns |
|                             |             |                       |            | LA:HFD vs HFD     | ns |
|                             |             |                       |            | LA:HFD vs. LA     | ns |
| [4, 5- <sup>13</sup> C]-Gln | Interaction | F (1, 15) = 0.6086    | P = 0.4474 | <b>HFD vs CON</b> | *  |

|                              |             |                      |            |                      |    |
|------------------------------|-------------|----------------------|------------|----------------------|----|
|                              | HFD         | F (1, 15) = 3.397    | P = 0.0852 | LA vs CON            | ns |
|                              | LA          | F (1, 15) = 21.34    | P = 0.0003 | LA:HFD vs. CON       | ns |
|                              |             |                      |            | LA vs HFD            | ** |
|                              |             |                      |            | LA:HFD vs HFD        | ns |
|                              |             |                      |            | LA:HFD vs. LA        | ** |
| [1, 2- <sup>13</sup> C]-Gln  | Interaction | F (1, 15) = 1.215    | P = 0.2920 | HFD vs CON           | ns |
|                              | HFD         | F (1, 15) = 3.347    | P = 0.0923 | LA vs CON            | ns |
|                              | LA          | F (1, 15) = 3.382    | P = 0.0908 | LA:HFD vs. CON       | ns |
|                              |             |                      |            | LA vs HFD            | ns |
|                              |             |                      |            | LA:HFD vs HFD        | ns |
|                              |             |                      |            | LA:HFD vs. LA        | ns |
| [2, 3- <sup>13</sup> C]-Gln# | Interaction | F (1, 15) = 1.749    | P = 0.2072 | <b>HFD vs CON</b>    | ** |
|                              | HFD         | F (1, 15) = 1.594    | P = 0.2274 | LA vs CON            | ns |
|                              | LA          | F (1, 15) = 15.54    | P = 0.0015 | LA:HFD vs. CON       | ns |
|                              |             |                      |            | LA vs HFD            | ** |
|                              |             |                      |            | LA:HFD vs HFD        | ns |
|                              |             |                      |            | LA:HFD vs. LA        | ns |
| [4- <sup>13</sup> C]-Asp     | Interaction | F (1, 15) = 1.453    | P = 0.2496 | <b>HFD vs CON</b>    | *  |
|                              | HFD         | F (1, 15) = 11.52    | P = 0.0048 | LA vs CON            | ns |
|                              | LA          | F (1, 15) = 4.053    | P = 0.0653 | LA:HFD vs. CON       | ns |
|                              |             |                      |            | LA vs HFD            | ** |
|                              |             |                      |            | <b>LA:HFD vs HFD</b> | *  |
|                              |             |                      |            | LA:HFD vs. LA        | ns |
| [3- <sup>13</sup> C]-Asp     | Interaction | F (1, 15) = 0.3693   | P = 0.5519 | HFD vs CON           | ns |
|                              | HFD         | F (1, 15) = 1.008    | P = 0.3302 | LA vs CON            | ns |
|                              | LA          | F (1, 15) = 0.008689 | P = 0.9269 | LA:HFD vs. CON       | ns |
|                              |             |                      |            | LA vs HFD            | ns |
|                              |             |                      |            | LA:HFD vs HFD        | ns |
|                              |             |                      |            | LA:HFD vs. LA        | ns |
| [2- <sup>13</sup> C]-Asp     | Interaction | F (1, 15) = 0.6440   | P = 0.4348 | HFD vs CON           | ns |
|                              | HFD         | F (1, 15) = 1.012    | P = 0.3304 | LA vs CON            | ns |
|                              | LA          | F (1, 15) = 0.009164 | P = 0.9250 | LA:HFD vs. CON       | ns |
|                              |             |                      |            | LA vs HFD            | ns |
|                              |             |                      |            | LA:HFD vs HFD        | ns |
|                              |             |                      |            | LA:HFD vs. LA        | ns |
| [1- <sup>13</sup> C]-Asp     | Interaction | F (1, 14) = 0.4090   | P = 0.5328 | HFD vs CON           | ns |

|                             |             |                      |            |                      |    |
|-----------------------------|-------------|----------------------|------------|----------------------|----|
|                             | HFD         | F (1, 14) = 0.02480  | P = 0.8771 | LA vs CON            | ns |
|                             | LA          | F (1, 14) = 1.760    | P = 0.2059 | LA:HFD vs. CON       | ns |
|                             |             |                      |            | LA vs HFD            | ns |
|                             |             |                      |            | LA:HFD vs HFD        | ns |
|                             |             |                      |            | LA:HFD vs. LA        | ns |
| [2, 3- <sup>13</sup> C]-Asp | Interaction | F (1, 15) = 1.309    | P = 0.2693 | HFD vs CON           | ns |
|                             | HFD         | F (1, 15) = 4.115    | P = 0.0595 | LA vs CON            | ns |
|                             | LA          | F (1, 15) = 0.2951   | P = 0.5944 | LA:HFD vs. CON       | ns |
|                             |             |                      |            | LA vs HFD            | ns |
|                             |             |                      |            | LA:HFD vs HFD        | ns |
|                             |             |                      |            | LA:HFD vs. LA        | ns |
| [3, 4- <sup>13</sup> C]-Asp | Interaction | F (1, 15) = 0.4585   | P = 0.5075 | HFD vs CON           | ns |
|                             | HFD         | F (1, 15) = 1.153    | P = 0.2979 | LA vs CON            | ns |
|                             | LA          | F (1, 15) = 0.3561   | P = 0.5585 | LA:HFD vs. CON       | ns |
|                             |             |                      |            | LA vs HFD            | ns |
|                             |             |                      |            | LA:HFD vs HFD        | ns |
|                             |             |                      |            | LA:HFD vs. LA        | ns |
| [4- <sup>13</sup> C]-GABA   | Interaction | F (1, 15) = 0.006026 | P = 0.9391 | HFD vs CON           | ns |
|                             | HFD         | F (1, 15) = 1.144    | P = 0.3007 | LA vs CON            | ns |
|                             | LA          | F (1, 15) = 0.1429   | P = 0.7104 | LA:HFD vs. CON       | ns |
|                             |             |                      |            | LA vs HFD            | ns |
|                             |             |                      |            | LA:HFD vs HFD        | ns |
|                             |             |                      |            | LA:HFD vs. LA        | ns |
| [3- <sup>13</sup> C]-GABA   | Interaction | F (1, 15) = 5.412    | P = 0.0368 | <b>HFD vs CON</b>    | ** |
|                             | HFD         | F (1, 15) = 5.761    | P = 0.0321 | LA vs CON            | ns |
|                             | LA          | F (1, 15) = 4.840    | P = 0.0465 | LA:HFD vs. CON       | ns |
|                             |             |                      |            | <b>LA vs HFD</b>     | *  |
|                             |             |                      |            | <b>LA:HFD vs HFD</b> | ** |
|                             |             |                      |            | LA:HFD vs. LA        | ns |
| [2- <sup>13</sup> C]-GABA   | Interaction | F (1, 15) = 6.714    | P = 0.0205 | <b>HFD vs CON</b>    | *  |
|                             | HFD         | F (1, 15) = 2.524    | P = 0.1330 | LA vs CON            | ns |
|                             | LA          | F (1, 15) = 2.864    | P = 0.1112 | LA:HFD vs. CON       | ns |
|                             |             |                      |            | <b>LA vs HFD</b>     | *  |
|                             |             |                      |            | <b>LA:HFD vs HFD</b> | *  |
|                             |             |                      |            | LA:HFD vs. LA        | ns |
| [1- <sup>13</sup> C]-GABA   | Interaction | F (1, 14) = 1.632    | P = 0.2222 | HFD vs CON           | ns |



|                             |             |                     |            |                |    |
|-----------------------------|-------------|---------------------|------------|----------------|----|
|                             | HFD         | F (1, 14) = 2.960   | P = 0.1074 | LA vs CON      | ns |
|                             | LA          | F (1, 14) = 0.01134 | P = 0.9167 | LA:HFD vs. CON | ns |
|                             |             |                     |            | LA vs HFD      | ns |
|                             |             |                     |            | LA:HFD vs HFD  | ns |
|                             |             |                     |            | LA:HFD vs. LA  | ns |
| [1,2- <sup>13</sup> C]-GABA | Interaction | F (1, 16) = 0.6518  | P = 0.4300 | HFD vs CON     | ns |
|                             | HFD         | F (1, 16) = 4.670   | P = 0.0444 | LA vs CON      | ns |
|                             | LA          | F (1, 16) = 0.9282  | P = 0.3481 | LA:HFD vs. CON | ns |
|                             |             |                     |            | LA vs HFD      | ns |
|                             |             |                     |            | LA:HFD vs HFD  | ns |
|                             |             |                     |            | LA:HFD vs. LA  | ns |
| [2,3- <sup>13</sup> C]-GABA | Interaction | F (1, 16) = 0.1831  | P = 0.6738 | HFD vs CON     | ns |
|                             | HFD         | F (1, 16) = 0.6463  | P = 0.4319 | LA vs CON      | ns |
|                             | LA          | F (1, 16) = 0.1725  | P = 0.6828 | LA:HFD vs. CON | ns |
|                             |             |                     |            | LA vs HFD      | ns |
|                             |             |                     |            | LA:HFD vs HFD  | ns |
|                             |             |                     |            | LA:HFD vs. LA  | ns |
| [3,4- <sup>13</sup> C]-GABA | Interaction | F (1, 15) = 0.01264 | P = 0.9122 | HFD vs CON     | ns |
|                             | HFD         | F (1, 15) = 2.214   | P = 0.1606 | LA vs CON      | ns |
|                             | LA          | F (1, 15) = 1.762   | P = 0.2072 | LA:HFD vs. CON | ns |
|                             |             |                     |            | LA vs HFD      | ns |
|                             |             |                     |            | LA:HFD vs HFD  | ns |
|                             |             |                     |            | LA:HFD vs. LA  | ns |
| [4,6- <sup>13</sup> C]-MI   | Interaction | F (1, 15) = 2.092   | P = 0.1652 | HFD vs CON     | ns |
|                             | HFD         | F (1, 15) = 0.2718  | P = 0.6085 | LA vs CON      | ns |
|                             | LA          | F (1, 15) = 2.142   | P = 0.1606 | LA:HFD vs. CON | ns |
|                             |             |                     |            | LA vs HFD      | ns |
|                             |             |                     |            | LA:HFD vs HFD  | ns |
|                             |             |                     |            | LA:HFD vs. LA  | ns |
| [2- <sup>13</sup> C]-MI     | Interaction | F (1, 15) = 4.015   | P = 0.0604 | HFD vs CON     | ns |
|                             | HFD         | F (1, 15) = 0.1890  | P = 0.6689 | LA vs CON      | ns |
|                             | LA          | F (1, 15) = 0.5965  | P = 0.4499 | LA:HFD vs. CON | ns |
|                             |             |                     |            | LA vs HFD      | ns |
|                             |             |                     |            | LA:HFD vs HFD  | ns |
|                             |             |                     |            | LA:HFD vs. LA  | ns |
| [1,3- <sup>13</sup> C]-MI   | Interaction | F (1, 15) = 0.1929  | P = 0.6657 | HFD vs CON     | ns |

|                              |             |                    |            |                |    |
|------------------------------|-------------|--------------------|------------|----------------|----|
|                              |             |                    |            | LA:HFD vs. LA  | ns |
| % <sup>3-13</sup> C]-Glu     | ANOVA table | F (DFn, DFd)       | P value    | HFD vs.CON     | ns |
|                              | Interaction | F (1, 15) = 1.489  | P = 0.2425 | LA vs.CON      | ns |
|                              | HFD         | F (1, 15) = 7.390  | P = 0.0166 | LA:HFD vs.CON  | ns |
|                              | LA          | F (1, 15) = 1.971  | P = 0.1821 | LA vs. HFD     | ns |
|                              |             |                    |            | LA:HFD vs. HFD | ns |
|                              |             |                    |            | LA:HFD vs. LA  | ns |
| % <sup>2-13</sup> C]-Glu     | ANOVA table | F (DFn, DFd)       | P value    | HFD vs.CON     | ns |
|                              | Interaction | F (1, 15) = 0.8934 | P = 0.3606 | LA vs.CON      | ns |
|                              | HFD         | F (1, 15) = 6.365  | P = 0.0244 | LA:HFD vs.CON  | ns |
|                              | LA          | F (1, 15) = 0.3222 | P = 0.5793 | LA vs. HFD     | ns |
|                              |             |                    |            | LA:HFD vs. HFD | ns |
|                              |             |                    |            | LA:HFD vs. LA  | ns |
| % <sup>4, 5-13</sup> C]-Glu  | ANOVA table | F (DFn, DFd)       | P value    | HFD vs.CON     | ns |
|                              | Interaction | F (1, 15) = 0.3575 | P = 0.5602 | LA vs.CON      | ns |
|                              | HFD         | F (1, 15) = 8.737  | P = 0.0111 | LA:HFD vs.CON  | ns |
|                              | LA          | F (1, 15) = 1.326  | P = 0.2702 | LA vs. HFD     | ns |
|                              |             |                    |            | LA:HFD vs. HFD | ns |
|                              |             |                    |            | LA:HFD vs. LA  | ns |
| % <sup>1, 2-13</sup> C]-Glu  | ANOVA table | F (DFn, DFd)       | P value    | HFD vs.CON     | ns |
|                              | Interaction | F (1, 16) = 0.9158 | P = 0.3528 | LA vs.CON      | ns |
|                              | HFD         | F (1, 16) = 2.048  | P = 0.1716 | LA:HFD vs.CON  | ns |
|                              | LA          | F (1, 16) = 5.878  | P = 0.0275 | LA vs. HFD     | ns |
|                              |             |                    |            | LA:HFD vs. HFD | ns |
|                              |             |                    |            | LA:HFD vs. LA  | ns |
| % <sup>2, 3-13</sup> C]-Glu# | ANOVA table | F (DFn, DFd)       | P value    | HFD vs.CON     | ns |
|                              | Interaction | F (1, 15) = 0.2929 | P = 0.5958 | LA vs.CON      | ns |
|                              | HFD         | F (1, 15) = 4.667  | P = 0.0463 | LA:HFD vs.CON  | ns |
|                              | LA          | F (1, 15) = 1.016  | P = 0.3284 | LA vs. HFD     | ns |
|                              |             |                    |            | LA:HFD vs. HFD | ns |
|                              |             |                    |            | LA:HFD vs. LA  | ns |
| % <sup>4-13</sup> C]-Gln     | ANOVA table | F (DFn, DFd)       | P value    | HFD vs.CON     | ns |
|                              | Interaction | F (1, 15) = 0.5061 | P = 0.4871 | LA vs.CON      | ns |
|                              | HFD         | F (1, 15) = 5.051  | P = 0.0391 | LA:HFD vs.CON  | ns |
|                              | LA          | F (1, 15) = 0.3088 | P = 0.5861 | LA vs. HFD     | ns |
|                              |             |                    |            | LA:HFD vs. HFD | ns |

|                            |                      |                      |            |                                               |          |
|----------------------------|----------------------|----------------------|------------|-----------------------------------------------|----------|
|                            | HFD                  | F (1, 15) = 0.001172 | P = 0.9731 | LA vs CON                                     | ns       |
|                            | LA                   | F (1, 15) = 0.2349   | P = 0.6337 | LA:HFD vs. CON                                | ns       |
|                            |                      |                      |            | LA vs HFD                                     | ns       |
|                            |                      |                      |            | LA:HFD vs HFD                                 | ns       |
|                            |                      |                      |            | LA:HFD vs. LA                                 | ns       |
| [5- <sup>13</sup> C]-MI    | Interaction          | F (1, 15) = 6.479    | P = 0.0216 | HFD vs CON                                    | ns       |
|                            | HFD                  | F (1, 15) = 0.4671   | P = 0.5041 | LA vs CON                                     | ns       |
|                            | LA                   | F (1, 15) = 2.119    | P = 0.1648 | LA:HFD vs. CON                                | ns       |
|                            |                      |                      |            | LA vs HFD                                     | ns       |
|                            |                      |                      |            | LA:HFD vs HFD                                 | ns       |
|                            |                      |                      |            | LA:HFD vs. LA                                 | ns       |
| [6- <sup>13</sup> C]-NAA   | Interaction          | F (1, 15) = 0.05496  | P = 0.8176 | HFD vs CON                                    | ns       |
|                            | HFD                  | F (1, 15) = 0.1240   | P = 0.7294 | LA vs CON                                     | ns       |
|                            | LA                   | F (1, 15) = 0.02992  | P = 0.8648 | LA:HFD vs. CON                                | ns       |
|                            |                      |                      |            | LA vs HFD                                     | ns       |
|                            |                      |                      |            | LA:HFD vs HFD                                 | ns       |
|                            |                      |                      |            | LA:HFD vs. LA                                 | ns       |
| [3- <sup>13</sup> C]-NAA   | Interaction          | F (1, 15) = 1.316    | P = 0.2664 | HFD vs CON                                    | ns       |
|                            | HFD                  | F (1, 15) = 3.751    | P = 0.0686 | LA vs CON                                     | ns       |
|                            | LA                   | F (1, 15) = 0.05959  | P = 0.8099 | LA:HFD vs. CON                                | ns       |
|                            |                      |                      |            | LA vs HFD                                     | ns       |
|                            |                      |                      |            | LA:HFD vs HFD                                 | ns       |
|                            |                      |                      |            | LA:HFD vs. LA                                 | ns       |
| [2- <sup>13</sup> C]-NAA   | Interaction          | F (1, 15) = 0.04492  | P = 0.8347 | HFD vs CON                                    | ns       |
|                            | HFD                  | F (1, 15) = 1.506    | P = 0.2365 | LA vs CON                                     | ns       |
|                            | LA                   | F (1, 15) = 1.020    | P = 0.3266 | LA:HFD vs. CON                                | ns       |
|                            |                      |                      |            | LA vs HFD                                     | ns       |
|                            |                      |                      |            | LA:HFD vs HFD                                 | ns       |
|                            |                      |                      |            | LA:HFD vs. LA                                 | ns       |
| Figure 4                   | <b>TWO WAY ANOVA</b> |                      |            | <b>Newman-Keuls multiple comparisons test</b> |          |
| % [4- <sup>13</sup> C]-Glu | ANOVA table          | F (DFn, DFd)         | P value    | HFD vs.CON                                    | ns       |
|                            | Interaction          | F (1, 15) = 1.515    | P = 0.2402 | LA vs.CON                                     | ns       |
|                            | HFD                  | F (1, 15) = 10.23    | P = 0.0070 | LA:HFD vs.CON                                 | ns       |
|                            | LA                   | F (1, 15) = 0.1621   | P = 0.6938 | LA vs. HFD                                    | ns       |
|                            |                      |                      |            | <b>LA:HFD vs. HFD</b>                         | <b>*</b> |

|                              |             |                       |            |                       |    |
|------------------------------|-------------|-----------------------|------------|-----------------------|----|
|                              |             |                       |            | LA:HFD vs. LA         | ns |
| % <sup>3-13</sup> C]-Gln     | ANOVA table | F (DFn, DFd)          | P value    | HFD vs.CON            | ns |
|                              | Interaction | F (1, 15) = 1.384     | P = 0.2578 | LA vs.CON             | ns |
|                              | HFD         | F (1, 15) = 6.106     | P = 0.0259 | LA:HFD vs.CON         | ns |
|                              | LA          | F (1, 15) = 0.1369    | P = 0.7166 | LA vs. HFD            | ns |
|                              |             |                       |            | LA:HFD vs. HFD        | ns |
|                              |             |                       |            | LA:HFD vs. LA         | ns |
| % <sup>2-13</sup> C]-Gln     | ANOVA table | F (DFn, DFd)          | P value    | HFD vs.CON            | ns |
|                              | Interaction | F (1, 15) = 0.5232    | P = 0.4799 | LA vs.CON             | ns |
|                              | HFD         | F (1, 15) = 4.348     | P = 0.0534 | LA:HFD vs.CON         | ns |
|                              | LA          | F (1, 15) = 0.0006063 | P = 0.9807 | LA vs. HFD            | ns |
|                              |             |                       |            | LA:HFD vs. HFD        | ns |
|                              |             |                       |            | LA:HFD vs. LA         | ns |
| % <sup>4, 5-13</sup> C]-Gln  | ANOVA table | F (DFn, DFd)          | P value    | <b>HFD vs.CON</b>     | *  |
|                              | Interaction | F (1, 15) = 1.032     | P = 0.3258 | LA vs.CON             | ns |
|                              | HFD         | F (1, 15) = 6.684     | P = 0.0207 | LA:HFD vs.CON         | ns |
|                              | LA          | F (1, 15) = 13.12     | P = 0.0025 | LA vs. HFD            | ** |
|                              |             |                       |            | <b>LA:HFD vs. HFD</b> | *  |
|                              |             |                       |            | LA:HFD vs. LA         | ns |
| % <sup>1, 2-13</sup> C]-Gln  | ANOVA table | F (DFn, DFd)          | P value    | <b>HFD vs.CON</b>     | *  |
|                              | Interaction | F (1, 15) = 4.654     | P = 0.0503 | LA vs.CON             | ns |
|                              | HFD         | F (1, 15) = 4.115     | P = 0.0635 | LA:HFD vs.CON         | ns |
|                              | LA          | F (1, 15) = 3.807     | P = 0.0729 | LA vs. HFD            | *  |
|                              |             |                       |            | <b>LA:HFD vs. HFD</b> | *  |
|                              |             |                       |            | LA:HFD vs. LA         | ns |
| % <sup>2, 3-13</sup> C]-Gln# | ANOVA table | F (DFn, DFd)          | P value    | <b>HFD vs.CON</b>     | *  |
|                              | Interaction | F (1, 15) = 1.300     | P = 0.2733 | LA vs.CON             | ns |
|                              | HFD         | F (1, 15) = 6.618     | P = 0.0221 | LA:HFD vs.CON         | ns |
|                              | LA          | F (1, 15) = 4.408     | P = 0.0544 | <b>LA vs. HFD</b>     | *  |
|                              |             |                       |            | <b>LA:HFD vs. HFD</b> | *  |
|                              |             |                       |            | LA:HFD vs. LA         | ns |
| % <sup>4-13</sup> C]-GABA    | ANOVA table | F (DFn, DFd)          | P value    | HFD vs.CON            | ns |
|                              | Interaction | F (1, 15) = 0.005719  | P = 0.9406 | LA vs.CON             | ns |
|                              | HFD         | F (1, 15) = 4.006     | P = 0.0616 | LA:HFD vs.CON         | ns |
|                              | LA          | F (1, 15) = 0.02576   | P = 0.8744 | LA vs. HFD            | ns |
|                              |             |                       |            | LA:HFD vs. HFD        | ns |

|                             |             |                     |            |                       |    |
|-----------------------------|-------------|---------------------|------------|-----------------------|----|
|                             |             |                     |            | LA:HFD vs. LA         | ns |
| % <sup>3-13</sup> C]-GABA   | ANOVA table | F (DFn, DFd)        | P value    | <b>HFD vs.CON</b>     | ** |
|                             | Interaction | F (1, 15) = 5.224   | P = 0.0372 | LA vs.CON             | ns |
|                             | HFD         | F (1, 15) = 10.31   | P = 0.0058 | LA:HFD vs.CON         | ns |
|                             | LA          | F (1, 15) = 4.362   | P = 0.0542 | <b>LA vs. HFD</b>     | ** |
|                             |             |                     |            | <b>LA:HFD vs. HFD</b> | ** |
|                             |             |                     |            | LA:HFD vs. LA         | ns |
| % <sup>2-13</sup> C]-GABA   | ANOVA table | F (DFn, DFd)        | P value    | <b>HFD vs.CON</b>     | ** |
|                             | Interaction | F (1, 15) = 5.602   | P = 0.0318 | LA vs.CON             | ns |
|                             | HFD         | F (1, 15) = 8.948   | P = 0.0091 | LA:HFD vs.CON         | ns |
|                             | LA          | F (1, 15) = 4.730   | P = 0.0460 | <b>LA vs. HFD</b>     | ** |
|                             |             |                     |            | <b>LA:HFD vs. HFD</b> | ** |
|                             |             |                     |            | LA:HFD vs. LA         | ns |
| % <sup>1-13</sup> C]-GABA   | ANOVA table | F (DFn, DFd)        | P value    | HFD vs.CON            | ns |
|                             | Interaction | F (1, 14) = 1.765   | P = 0.2109 | LA vs.CON             | ns |
|                             | HFD         | F (1, 14) = 3.138   | P = 0.1041 | LA:HFD vs.CON         | ns |
|                             | LA          | F (1, 14) = 0.06131 | P = 0.8090 | LA vs. HFD            | ns |
|                             |             |                     |            | LA:HFD vs. HFD        | ns |
|                             |             |                     |            | LA:HFD vs. LA         | ns |
| % <sup>1,2-13</sup> C]-GABA | ANOVA table | F (DFn, DFd)        | P value    | HFD vs.CON            | ns |
|                             | Interaction | F (1, 15) = 0.1448  | P = 0.7102 | LA vs.CON             | ns |
|                             | HFD         | F (1, 15) = 4.725   | P = 0.0505 | LA:HFD vs.CON         | ns |
|                             | LA          | F (1, 15) = 1.055   | P = 0.3246 | LA vs. HFD            | ns |
|                             |             |                     |            | LA:HFD vs. HFD        | ns |
|                             |             |                     |            | LA:HFD vs. LA         | ns |
| % <sup>2,3-13</sup> C]-GABA | ANOVA table | F (DFn, DFd)        | P value    | HFD vs.CON            | ns |
|                             | Interaction | F (1, 15) = 0.2419  | P = 0.6300 | LA vs.CON             | ns |
|                             | HFD         | F (1, 15) = 0.4501  | P = 0.5125 | LA:HFD vs.CON         | ns |
|                             | LA          | F (1, 15) = 0.2254  | P = 0.6418 | LA vs. HFD            | ns |
|                             |             |                     |            | LA:HFD vs. HFD        | ns |
|                             |             |                     |            | LA:HFD vs. LA         | ns |
| % <sup>4-13</sup> C]-Asp    | ANOVA table | F (DFn, DFd)        | P value    | HFD vs. CON           | ns |
|                             | Interaction | F (1, 15) = 0.08103 | P = 0.7808 | LA vs. CON            | ns |
|                             | HFD         | F (1, 15) = 5.253   | P = 0.0408 | LA:HFD vs. CON        | ns |
|                             | LA          | F (1, 15) = 3.157   | P = 0.1010 | LA vs. HFD            | ns |
|                             |             |                     |            | LA:HFD vs. HFD        | ns |

|                            |             |                     |            |                   |    |
|----------------------------|-------------|---------------------|------------|-------------------|----|
|                            |             |                     |            | LA:HFD vs.LA      | ns |
| % <sup>3-13</sup> C]-Asp   | ANOVA table | F (DFn, DFd)        | P value    | HFD vs.CON        | ns |
|                            | Interaction | F (1, 15) = 0.04846 | P = 0.9529 | LA vs. CON        | ns |
|                            | HFD         | F (1, 15) = 2.872   | P = 0.1140 | LA:HFD vs. CON    | ns |
|                            | LA          | F (1, 15) = 1.294   | P = 0.3073 | LA vs. HFD        | ns |
|                            |             |                     |            | LA:HFD vs. HFD    | ns |
|                            |             |                     |            | LA:HFD vs.LA      | ns |
| % <sup>2-13</sup> C]-Asp   | ANOVA table | F (DFn, DFd)        | P value    | HFD vs. CON       | ns |
|                            | Interaction | F (1, 15) = 0.01596 | P = 0.9012 | LA vs. CON        | ns |
|                            | HFD         | F (1, 15) = 1.679   | P = 0.2147 | LA:HFD vs. CON    | ns |
|                            | LA          | F (1, 15) = 0.1815  | P = 0.6761 | LA vs. HFD        | ns |
|                            |             |                     |            | LA:HFD vs. HFD    | ns |
|                            |             |                     |            | LA:HFD vs.LA      | ns |
| % <sup>1-13</sup> C]-Asp   | ANOVA table | F (DFn, DFd)        | P value    | HFD vs. CON       | ns |
|                            | Interaction | F (1, 14) = 0.09941 | P = 0.7569 | LA vs. CON        | ns |
|                            | HFD         | F (1, 14) = 1.003   | P = 0.3326 | LA:HFD vs. CON    | ns |
|                            | LA          | F (1, 14) = 2.384   | P = 0.1434 | LA vs. HFD        | ns |
|                            |             |                     |            | LA:HFD vs. HFD    | ns |
|                            |             |                     |            | LA:HFD vs.LA      | ns |
| % <sup>1,2-13</sup> C]-Asp | ANOVA table | F (DFn, DFd)        | P value    | HFD vs. CON       | ns |
|                            | Interaction | F (1, 14) = 0.5522  | P = 0.4697 | LA vs. CON        | ns |
|                            | HFD         | F (1, 14) = 0.06892 | P = 0.7967 | LA:HFD vs. CON    | ns |
|                            | LA          | F (1, 14) = 0.04643 | P = 0.8325 | LA vs. HFD        | ns |
|                            |             |                     |            | LA:HFD vs. HFD    | ns |
|                            |             |                     |            | LA:HFD vs.LA      | ns |
| % <sup>2,3-13</sup> C]-Asp | ANOVA table | F (DFn, DFd)        | P value    | HFD vs. CON       | ns |
|                            | Interaction | F (1, 15) = 2.249   | P = 0.1532 | <b>LA vs. CON</b> | *  |
|                            | HFD         | F (1, 15) = 8.870   | P = 0.0089 | LA:HFD vs. CON    | ns |
|                            | LA          | F (1, 15) = 0.1691  | P = 0.6864 | LA vs. HFD        | ns |
|                            |             |                     |            | LA:HFD vs. HFD    | ns |
|                            |             |                     |            | LA:HFD vs.LA      | ns |
| % <sup>3,4-13</sup> C]-Asp | ANOVA table | F (DFn, DFd)        | P value    | HFD vs. CON       | ns |
|                            | Interaction | F (1, 15) = 1.064   | P = 0.3159 | LA vs. CON        | ns |
|                            | HFD         | F (1, 15) = 3.436   | P = 0.0803 | LA:HFD vs. CON    | ns |
|                            | LA          | F (1, 15) = 0.1951  | P = 0.6640 | LA vs. HFD        | ns |
|                            |             |                     |            | LA:HFD vs. HFD    | ns |

|                                                 |                      |                     |            | LA:HFD vs.LA                                  | ns |
|-------------------------------------------------|----------------------|---------------------|------------|-----------------------------------------------|----|
| Figure 6                                        | <b>TWO WAY ANOVA</b> |                     |            | <b>Newman-Keuls multiple comparisons test</b> |    |
| %Glycolity Acitivity                            |                      | F (DFn, DFd)        | P value    | <b>HFD vs. CON</b>                            | *  |
|                                                 | Interaction          | F (1, 15) = 4.972   | P = 0.0415 | LA vs. CON                                    | ns |
|                                                 | HFD                  | F (1, 15) = 3.065   | P = 0.1004 | LA:HFD vs. CON                                | ns |
|                                                 | LA                   | F (1, 15) = 4.143   | P = 0.0599 | LA vs. HFD                                    | *  |
|                                                 |                      |                     |            | <b>LA:HFD vs. HFD</b>                         | *  |
|                                                 |                      |                     |            | LA:HFD vs. LA                                 | ns |
| TCA Cycle Activity                              |                      | F (DFn, DFd)        | P value    | <b>HFD vs. CON</b>                            | *  |
|                                                 | Interaction          | F (1, 15) = 6.921   | P = 0.0208 | LA vs. CON                                    | ns |
|                                                 | HFD                  | F (1, 15) = 0.2142  | P = 0.6512 | LA:HFD vs. CON                                | ns |
|                                                 | LA                   | F (1, 15) = 4.424   | P = 0.0555 | LA vs. HFD                                    | ns |
|                                                 |                      |                     |            | LA:HFD vs. HFD                                | ns |
|                                                 |                      |                     |            | LA:HFD vs. LA                                 | ns |
| <sup>13</sup> C Glucose Cycling Glutamine       | Interaction          | F (1, 15) = 0.03147 | P = 0.8619 | HFD vs. CON                                   | ns |
|                                                 | HFD                  | F (1, 15) = 0.05630 | P = 0.8161 | LA vs. CON                                    | ns |
|                                                 | LA                   | F (1, 15) = 0.03393 | P = 0.8567 | LA:HFD vs. CON                                | ns |
|                                                 |                      |                     |            | LA vs. HFD                                    | ns |
|                                                 |                      |                     |            | LA:HFD vs. HFD                                | ns |
|                                                 |                      |                     |            | LA:HFD vs. LA                                 | ns |
| <sup>13</sup> C Glucose Cycling Glutamate       | Interaction          | F (1, 15) = 6.921   | P = 0.0208 | <b>HFD vs. CON</b>                            | *  |
|                                                 | HFD                  | F (1, 15) = 0.2142  | P = 0.6512 | LA vs. CON                                    | ns |
|                                                 | LA                   | F (1, 15) = 4.424   | P = 0.0555 | LA:HFD vs. CON                                | ns |
|                                                 |                      |                     |            | LA vs. HFD                                    | ns |
|                                                 |                      |                     |            | LA:HFD vs. HFD                                | ns |
|                                                 |                      |                     |            | LA:HFD vs. LA                                 | ns |
| <sup>13</sup> C Acetate Cycling Ratio Glutamate | Interaction          | F (1, 15) = 2.902   | P = 0.1091 | HFD vs. CON                                   | ns |
|                                                 | HFD                  | F (1, 15) = 1.801   | P = 0.1996 | LA vs. CON                                    | ns |
|                                                 | LA                   | F (1, 15) = 0.2003  | P = 0.6609 | LA:HFD vs. CON                                | ns |
|                                                 |                      |                     |            | LA vs. HFD                                    | ns |
|                                                 |                      |                     |            | LA:HFD vs. HFD                                | ns |
|                                                 |                      |                     |            | LA:HFD vs. LA                                 | ns |
| <sup>13</sup> C Acetate Cycling Ratio Glutamine | Interaction          | F (1, 14) = 0.08376 | P = 0.7762 | HFD vs. CON                                   | ns |
|                                                 | HFD                  | F (1, 14) = 0.01694 | P = 0.8982 | LA vs. CON                                    | ns |
|                                                 | LA                   | F (1, 14) = 0.08765 | P = 0.7712 | LA:HFD vs. CON                                | ns |

|                                                                 |             |                     |            |                       |    |
|-----------------------------------------------------------------|-------------|---------------------|------------|-----------------------|----|
|                                                                 |             |                     |            | LA vs. HFD            | ns |
|                                                                 |             |                     |            | LA:HFD vs. HFD        | ns |
|                                                                 |             |                     |            | LA:HFD vs. LA         | ns |
| Astrocytes-Glu-Neurons Ratios                                   | Interaction | F (1, 15) = 1.167   | P = 0.3055 | <b>HFD vs. CON</b>    | *  |
|                                                                 | HFD         | F (1, 15) = 1.129   | P = 0.3131 | LA vs. CON            | ns |
|                                                                 | LA          | F (1, 15) = 15.86   | P = 0.0026 | <b>LA:HFD vs. CON</b> | ** |
|                                                                 |             |                     |            | LA vs. HFD            | ns |
|                                                                 |             |                     |            | LA:HFD vs. HFD        | ns |
|                                                                 |             |                     |            | LA:HFD vs. LA         | ns |
| Astrocytes-GABA-Neurons Ratios<br>Astrocytes-Glu-Neurons Ratios | Interaction | F (1, 15) = 3.734   | P = 0.0773 | <b>HFD vs. CON</b>    | *  |
|                                                                 | HFD         | F (1, 15) = 0.05036 | P = 0.8262 | LA vs. CON            | ns |
|                                                                 | LA          | F (1, 15) = 9.830   | P = 0.0086 | LA:HFD vs. CON        | ns |
|                                                                 |             |                     |            | LA vs. HFD            | ns |
|                                                                 |             |                     |            | LA:HFD vs. HFD        | ns |
|                                                                 |             |                     |            | LA:HFD vs. LA         | ns |

These data were analyzed by by Two-way ANOVA with diet (control/high-fat diet) and lipoic acid treatment (0 and 0.23% w/v in drinking water) as factors. Post-hoc analysis was performed using Student-Newman-Keuls correction for multiple comparison test. CON stands for control group, LA stands for lipoic acid treatment group, HFD stands for high-fat diet-feeding group, LA:HFD stands for high-fat diet with lipoic acid treatment group, ns stands for no significance,  $*p \leq 0.05$   $**p \leq 0.01$ , and [2,3- $^{13}\text{C}$ ]-Gln/Glu<sup>#</sup> stand for [2,3 and 3,4- $^{13}\text{C}$ ]-Gln/Glu, respectively.
